# Supplementary material
Source: PubMed Central journal article supplement (PMC4079228)
Supplement: CJP-2014-vol59-January-50-53-eAppendix.pdf [file CJP-2014-vol59-January-50-53-eAppendix.pdf]

Remick RA, Remick AK. Do patients really prefer individual outpatient follow-up visits, compared with group medical visits? Can J Psychiatry. 2014;59(1):50–53.

## Appendix A

### Semi-Structured Interview

Pt. #: \_\_\_\_\_

Date: \_\_\_\_\_

Time: \_\_\_\_\_

Gender: MALE                  FEMALE

Age: \_\_\_\_\_

Diagnosis: \_\_\_\_\_

Length of time as Dr. Remick's patient: \_\_\_\_\_

Have you had previous psychiatric treatment?                  YES                  NO

If YES, what format? \_\_\_\_\_

#### Individual Treatment

1. What were your expectations of individual psychiatric treatment? Did your individual treatment with Dr. Remick meet your expectations? If not, why? If so, why? Did it exceed them?
2. How did your mental health improve or deteriorate while under Dr. Remick's care in the individual setting?
3. What are the advantages of individual treatment? What are the disadvantages?
4. Did you find he was easily accessible when you needed to see him? On average how long did you have to wait to get an appointment?
5. Is there anything else that you would like to share with us about your experience with individual treatment?

#### Group Treatment

1. What were your thoughts and feelings when Dr. Remick informed you he was switching his practice to the format of Group Medical Visits?
2. What was your initial perception of GMVs? Had you heard of this method of practice before?
3. What were your expectations of GMVs? Has your experience with GMVs met your expectations? If not, why? If so, why? Did it exceed them?
4. How did your mental health improve or deteriorate while under Dr. Remick's care in the group setting?
5. What are the advantages of GMVs? What are the disadvantages?

6. Have you have had group therapy? If so how do you think it compares to GMVs? How are they similar? How are they different?

7. How accessible do you find Dr. Remick is now? How long do you have to wait to get an appointment with him now?

8. Is there anything else that you would like to share with us about your experience with GMVs?
