# Supplementary material
Source: PubMed Central journal article supplement (PMC4079228)
Supplement: CJP-2014-vol59-January-50-53-eTable1.pdf [file CJP-2014-vol59-January-50-53-eTable1.pdf]

Remick RA, Remick AK. Do patients really prefer individual outpatient follow-up visits, compared with group medical visits? *Can J Psychiatry*. 2014;59(1):50–53.

Table 1. Means and Standard Deviations for Questionnaire Items\*

| Individual Treatment Items<br>M (SD)                                                                 | GMV Items<br>M (SD)                                                                                           |
|------------------------------------------------------------------------------------------------------|---------------------------------------------------------------------------------------------------------------|
| 1. I felt the ease of scheduling an appointment with Dr. Remick was: 4.48 (.93)                      | 1. I feel the ease of scheduling an appointment with Dr. Remick is: 4.65 (.79)                                |
| 2. I typically felt that my individual appointments with Dr. Remick were: 4.58 (.75)                 | 2. I feel that my group medical appointments with Dr. Remick are: 3.99 (.95)                                  |
| 3. I felt the explanations of medical procedures, tests, and drugs were: 4.58 (.71)                  | 3. I feel the explanations of medical procedures, tests, and drugs are: 4.40 (.85)                            |
| 4. I felt that the knowledge I gained of my medical condition was: 4.35 (.85)                        | 4. I feel that the knowledge I have gained of my medical condition is: 4.14 (1.01)                            |
| 5. I felt that the knowledge I gained about my medications was: 4.38 (.86)                           | 5. I feel that the knowledge I have gained about my medications is: 4.23 (.90)                                |
| 6. I felt the amount of time I typically had with Dr. Remick was: 4.46 (.85)                         | 6. I feel the amount of time I have with Dr. Remick during a group medical appointment is: 3.82 (1.04)        |
| 7. I felt the personal interest in myself and my medical problems by Dr. Remick was: 4.73 (.69)      | 7. I feel the personal interest in myself and my medical problems by Dr. Remick is: 4.47 (.90)                |
| 8. Overall, I felt the quality of care and services I received were: 4.74 (.82)                      | 8. Overall, I feel the quality of care and services I receive is: 4.38 (.85)                                  |
| 9. Overall, when I saw Dr. Remick individually I felt that my mental health was: 3.48 (1.15)         | 9. Overall, since I started seeing Dr. Remick in a group format, I feel that my mental health is: 3.46 (1.11) |
| 10. Individual psychiatric care lessened the stigma that I felt having a mental illness. 3.19 (1.32) | 10. Group Medical Visits have lessened the stigma that I feel having a mental illness. 3.54 (1.28)            |

\* Items 1-9 were answered using a 5-point Likert scale, 5 = excellent, 4 = very good, 3 = good, 2 = fair, and 1 = poor. Item 10 was answered using a 5-point Likert scale, 1 = not at all, 3 = somewhat, and 5 = very much so.
